# Supplementary material
Source: MDPI journal article supplement (https://www.mdpi.com/2073-4441/15/4/690)
Supplement: s1 [file s1]

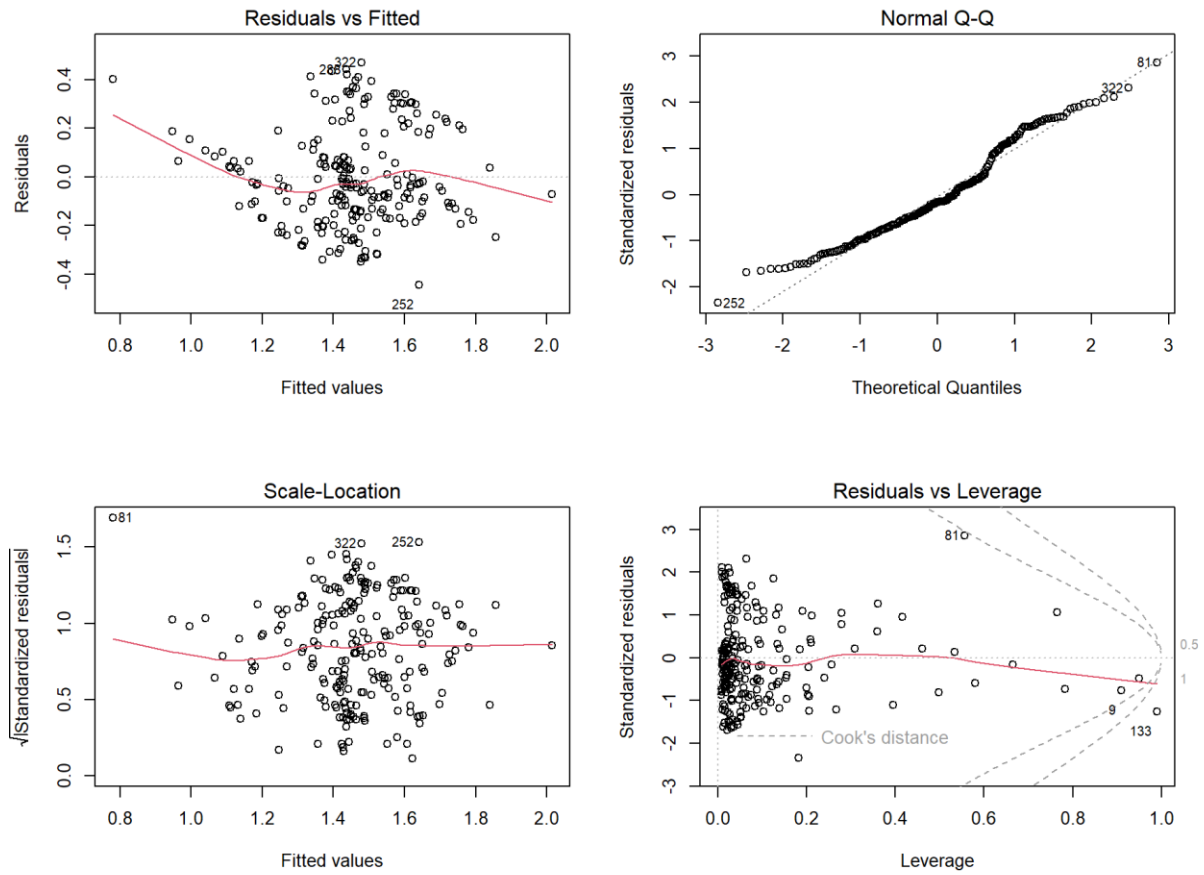

Figure S1: Diagnostic plots of multiple linear regression

Table S1: Land use grading system applied for calculation of La index

|              |                             |                                    |                                                     |                                               |
|--------------|-----------------------------|------------------------------------|-----------------------------------------------------|-----------------------------------------------|
| LULC type    | Un-used lands and bare soil | Forest, grassland and water bodies | Cultivated lands, gardens and artificial grass land | Cities, towns, industrial areas, mining areas |
| Degree index | 1                           | 2                                  | 3                                                   | 4                                             |

Source: Zhuang and Liu [38]

Table S2: The amount of variance inflation factor (VIF) for main effect and interaction effect of different predictors

|            |           |           |           |           |           |           |           |           |           |           |           |           |
|------------|-----------|-----------|-----------|-----------|-----------|-----------|-----------|-----------|-----------|-----------|-----------|-----------|
| Predictors | SWRN      | RNGE      | AGRR      | UTRN      | URML      | Elev      | SWRN:RNGE | SWRN:AGRR | SWRN:UTRN | SWRN:URML | SWRN:Elev | RNGE:AGRR |
| VIF        | 2.54      | 335.50    | 2.80      | 1417.92   | 1417.92   | 32.37     | 3.63      | 1.82      | 17.33     | 9.66      | 3.63      | 3.94      |
| Predictors | RNGE:UTRN | RNGE:URML | RNGE:Elev | AGRR:UTRN | AGRR:URML | AGRR:Elev | UTRN:URML | UTRN:Elev | URML:Elev |           |           |           |
| VIF        | 1477.71   | 433.41    | 5.12      | 33.31     | 295.07    | 5.80      | 327.13    | 844.23    | 510.52    |           |           |           |

Table S3: Performance metrics of different regression models for training and validation data

| Regression model type  | Training       |       | Validation     |       |
|------------------------|----------------|-------|----------------|-------|
|                        | R <sup>2</sup> | RMSE  | R <sup>2</sup> | RMSE  |
| Ridge regression       | 0.20           | 20.36 | 0.27           | 19.74 |
| Lasso regression       | 0.18           | 22.05 | 0.22           | 21.69 |
| Elastic Net regression | 0.20           | 20.14 | 0.27           | 19.37 |
